# Supplementary material for: „Nein, wir blättern noch nicht um“
Source: Atypon-hosted journal article supplement (doi:10.1026/2191-9186/a000643), 2024-01-30
Supplement: 2191-9186_a000643_esm1.pdf [file 2191-9186_a000643_esm1.pdf]

**ESM 1. Tabelle E1. Verhaltensindikatoren der Kinder zur Sensitiven Responsivität** (in Anlehnung an Girolametto & Weitzman, 2002; Remsperger 2011; Tannock & Girolametto, 1992; Weitzman, Girolametto & Greenberg, 2006; Weitzman & Greenberg, 2002)

| <b>Verhaltensindikatoren Kind</b> |                                                                  |                                                                                              |
|-----------------------------------|------------------------------------------------------------------|----------------------------------------------------------------------------------------------|
|                                   | <b>Nonverbale Signale – Beziehungsebene</b>                      | <b>Verbale Signale – Sprachebene</b>                                                         |
| <i>Indikator</i>                  | <b>Aufmerksamkeitsgesuche</b>                                    | <b>Antworten</b>                                                                             |
| <i>Ausprägungen</i>               | (1) verwendet keine/vereinzelt nonverbale Signale                | (1) beantwortet keine/vereinzelt Fragen / reagiert nicht/vereinzelt auf Äußerungen der FK    |
|                                   | (2) verwendet teilweise nonverbale Signale                       | (2) beantwortet teilweise Fragen / reagiert teilweise auf Äußerungen der FK                  |
|                                   | (3) verwendet überwiegend nonverbale Signale                     | (3) beantwortet überwiegend Fragen / reagiert auf Äußerungen der FK                          |
| <i>Indikator</i>                  | <b>Blickkontakt</b>                                              | <b>(Nach-)Fragen</b>                                                                         |
| <i>Ausprägungen</i>               | (1) hält keinen/vereinzelt Blickkontakt                          | (1) fragt nicht/vereinzelt nach /signalisiert keine/vereinzelt eigene Bedürfnisse/Interessen |
|                                   | (2) hält teilweise Blickkontakt                                  | (2) fragt teilweise nach / signalisiert teilweise eigene Bedürfnisse/Interessen              |
|                                   | (3) hält überwiegend Blickkontakt                                | (3) fragt überwiegend nach / signalisiert überwiegend eigene Bedürfnisse/Interessen          |
| <i>Indikator</i>                  | <b>Körperhaltung</b>                                             |                                                                                              |
| <i>Ausprägungen</i>               | (1) hat keine/vereinzelt eine zugewandte Körperhaltung           |                                                                                              |
|                                   | (2) hat teilweise eine zugewandte Körperhaltung                  |                                                                                              |
|                                   | (3) hat überwiegend eine zugewandte Körperhaltung                |                                                                                              |
| <i>Indikator</i>                  | <b>Mimik und Gestik</b>                                          |                                                                                              |
| <i>Ausprägungen</i>               | (1) verwendet keine/vereinzelt eine angemessene Mimik und Gestik |                                                                                              |
|                                   | (2) verwendet teilweise eine angemessene Mimik und Gestik        |                                                                                              |
|                                   | (3) verwendet überwiegend eine angemessene Mimik und Gestik      |                                                                                              |

**ESM 1. Tabelle E2. Verhaltensindikatoren der FK zur Sensitiven Responsivität** (in Anlehnung an Girolametto & Weitzman, 2002; Remsperger 2011; Tannock & Girolametto, 1992; Weitzman, Girolametto & Greenberg, 2006; Weitzman & Greenberg, 2002)

| <b>Verhaltensindikatoren FK</b> |                                                                                                                                                                                                                                                          |                                                                                                                                                                                              |
|---------------------------------|----------------------------------------------------------------------------------------------------------------------------------------------------------------------------------------------------------------------------------------------------------|----------------------------------------------------------------------------------------------------------------------------------------------------------------------------------------------|
|                                 | <b>Verbale Signale – Sprachebene</b>                                                                                                                                                                                                                     | <b>Nonverbale Signale – Beziehungsebene</b>                                                                                                                                                  |
| <i>Indikator</i>                | <b>(Nach-)Fragen</b>                                                                                                                                                                                                                                     | <b>Mimik und Gestik</b>                                                                                                                                                                      |
| <i>Ausprägungen</i>             | (1) stellt keine/vereinzelt (direkte) (Nach-)Fragen<br>(2) stellt teilweise (Nach-)Fragen<br>(3) stellt überwiegend (Nach-)Fragen                                                                                                                        | (1) verwendet keine/vereinzelt eine angemessene Mimik und Gestik<br>(2) verwendet teilweise eine angemessene Mimik und Gestik<br>(3) verwendet überwiegend eine angemessene Mimik und Gestik |
| <i>Indikator</i>                | <b>Prosodie</b>                                                                                                                                                                                                                                          | <b>Pausensetzung/Abwarten</b>                                                                                                                                                                |
| <i>Ausprägungen</i>             | (1) verwendet keine/vereinzelt eine angemessene Prosodie<br>(2) verwendet teilweise eine angemessene Prosodie<br>(3) verwendet überwiegend eine angemessene Prosodie                                                                                     | (1) nutzt keine/vereinzelt Redepausen<br>(2) nutzt teilweise Redepausen<br>(3) nutzt überwiegend Redepausen                                                                                  |
|                                 | <b>Verbale Signale – Beziehungsebene</b>                                                                                                                                                                                                                 |                                                                                                                                                                                              |
| <i>Indikator</i>                | <b>Kommunikation auf Augenhöhe/ Wertschätzung</b>                                                                                                                                                                                                        | <b>Aktives Zuhören</b>                                                                                                                                                                       |
| <i>Ausprägungen</i>             | (1) reagiert nicht/vereinzelt wertschätzend<br>(2) reagiert teilweise wertschätzend<br>(3) reagiert überwiegend wertschätzend                                                                                                                            | (1) Hört dem Kind nicht/vereinzelt zu<br>(2) Hört dem Kind teilweise zu<br>(3) Hört dem Kind überwiegend zu                                                                                  |
| <i>Indikator</i>                | <b>Aufmerksamkeitsfokus/Interessen des Kindes</b>                                                                                                                                                                                                        | <b>Blickkontakt</b>                                                                                                                                                                          |
| <i>Ausprägungen</i>             | (1) reagiert nicht/vereinzelt auf den Aufmerksamkeitsfokus/die Interessen des Kindes<br>(2) reagiert teilweise auf den Aufmerksamkeitsfokus/die Interessen des Kindes<br>(3) reagiert überwiegend auf den Aufmerksamkeitsfokus/die Interessen des Kindes | (1) hält keinen/vereinzelt Blickkontakt<br>(2) hält teilweise Blickkontakt<br>(3) hält überwiegend Blickkontakt                                                                              |

|                     |                                                                                                                                                                                                                                                                       |                                                                                                                                                                                                                         |
|---------------------|-----------------------------------------------------------------------------------------------------------------------------------------------------------------------------------------------------------------------------------------------------------------------|-------------------------------------------------------------------------------------------------------------------------------------------------------------------------------------------------------------------------|
| <i>Indikator</i>    | <b>Eingehen auf Anliegen/Bedürfnisse/Signale des Kindes</b>                                                                                                                                                                                                           | <b>Eingehen auf Anliegen/Bedürfnisse/Signale des Kindes</b>                                                                                                                                                             |
| <i>Ausprägungen</i> | (1) reagiert nicht/vereinzelt auf Anliegen/Bedürfnisse/Signale des Kindes<br>(2) reagiert teilweise auf Anliegen/Bedürfnisse/Signale des Kindes<br>(3) reagiert überwiegend auf Anliegen/Bedürfnisse/Signale des Kindes                                               | (1) reagiert nicht/vereinzelt auf Anliegen/Bedürfnisse/Signale des Kindes<br>(2) reagiert teilweise auf Anliegen/Bedürfnisse/Signale des Kindes<br>(3) reagiert überwiegend auf Anliegen/Bedürfnisse/Signale des Kindes |
| <i>Indikator</i>    | <b>Umgang mit Stimmungen/Emotionen</b>                                                                                                                                                                                                                                | <b>Körperhaltung</b>                                                                                                                                                                                                    |
| <i>Ausprägungen</i> | (1) zeigt keinen/vereinzelt einen angemessenen Umgang mit Stimmungen/Emotionen des Kindes<br>(2) zeigt teilweise einen angemessenen Umgang mit Stimmungen/Emotionen des Kindes<br>(3) zeigt überwiegend einen angemessenen Umgang mit Stimmungen/Emotionen des Kindes | (1) hat keine/vereinzelt eine zugewandte Körperhaltung<br>(2) hat teilweise eine zugewandte Körperhaltung<br>(3) hat überwiegend eine zugewandte Körperhaltung                                                          |
| <i>Indikator</i>    |                                                                                                                                                                                                                                                                       | <b>Nachahmen</b>                                                                                                                                                                                                        |
| <i>Ausprägungen</i> |                                                                                                                                                                                                                                                                       | (1) ahmt das Kind nicht/vereinzelt nach<br>(2) ahmt das Kind teilweise nach<br>(3) ahmt das Kind überwiegend nach                                                                                                       |
